# Supplementary material for: Identification of Transcriptional Signatures of Colon Tumor Stroma by a Meta-Analysis
Source: J Oncol. 2019 May 2;2019:8752862. doi: 10.1155/2019/8752862 (PMC6521457; doi:10.1155/2019/8752862)
Supplement: Supplementary Materials — Supplementary Figure S1: illustration of PCA and density plots as validation tools for batch effect removal. Plot of principal components: (A) before batch effect removal and (B) after batch effect removal. Plot of density: (C) before batch effect removal and (D) after batch effect removal. The multidimensional scaling of the datasets demonstrates that, before the batch effect adjustment, each dataset obviously separated from all the others, whereas, after batch effect adjustment, samples from all the datasets are incorporated clearly. Supplementary Figure S2: six KEEG pathways that are significantly associated with the downregulated genes in colon tumor stroma relative to normal stroma. Supplementary Figure S3: the genes (DEGs and their upstream regulators) whose expression is significantly associated with disease-free survival in colon cancer (log-rank test, p<0.05). Supplementary Figure S4: patients divided into the high-risk group and the low-risk group based on the prognostic gene signatures identified. A. Overall survival. B. Disease-free survival. Supplementary Figure S5: numbers of overlapping genes between the DEGs between colon tumor stroma and normal stroma and their upstream regulators and the DEGs between high-stroma-content and low-stroma-content colon cancers. UP TCGA: upregulated differentially expressed genes between high-stroma-content and low-stroma-content TCGA colon cancer samples and DOWN TCGA: downregulated differentially expressed genes between high-stroma-content and low-stroma-content TCGA colon cancer samples. Supplementary Table S1: a summary of the datasets used in this study. Supplementary Table S2: upregulated genes in colon tumor stroma versus colon normal stroma. Supplementary Table S3: downregulated genes in colon tumor stroma versus colon normal stroma. Supplementary Table S4: the top 10 upregulated and top 10 downregulated genes in colon tumor stroma. Supplementary Table S5: 44 KEGG pathways that were significantly associated with [file 8752862.f1.zip › Supplementary Tables.xlsx]

## Sheet: Table S1
Table S1. A summary of the datasets used in this study
Datasets	Sample size (Tumor stroma vs. Normal stroma)	Platform	Comparison	References	Tissue
GSE31279	20 (10 vs. 10)	Illumina human Ref-8 v2.0 expression beadchip	Tumor stroma vs. Normal stroma	[7]	Colon tumor stroma
GSE35602-GPL6480	17 （13 vs. 4）	Agilent-014850 Whole Human Genome Microarray 4x44K G4112F (Probe Name version)	Tumor stroma vs. Normal stroma	[8]	Colon tumor stroma
GSE46824	34 （25 vs. 9）	Affymetrix Human Gene 1.0 ST Array	Tumor stroma vs. Normal stroma	[9]	Colon tumor stroma
TCGA colon cancer	288	RNA-Seq	High stroma content vs. Low stroma content	https://gdc-portal.nci.nih.gov/	Colon cancer

## Sheet: Table S2
Table S2: Upregulated genes in colon tumor stroma versus colon normal stroma
Entrez ID	Symbol	Combined effect size (ES)	adjusted p-value
115908	CTHRC1	2.268	0.0014105
9603	NFE2L3	2.2357	0.00030226
23213	SULF1	2.1761	0.016976
6662	SOX9	2.0541	0.00010579
8507	ENC1	2.0531	3.7752e-07
595	CCND1	2.0363	0.00064679
1462	VCAN	2.0003	2.0265e-05
27253	PCDH17	1.9266	0.0018626
9037	SEMA5A	1.8928	0.0001364
255877	BCL6B	1.8901	0.0017374
9076	CLDN1	1.8517	0.0064426
5629	PROX1	1.7712	1.2361e-05
9991	PTBP3	1.762	0.00086822
9891	NUAK1	1.7579	1.3805e-05
11015	KDELR3	1.7497	1.3805e-05
9123	SLC16A3	1.7194	0.0057108
1289	COL5A1	1.6896	2.0265e-05
51085	MLXIPL	1.6826	0.0044149
56243	KIAA1217	1.6681	2.5976e-05
3002	GZMB	1.6588	0.021506
285761	DCBLD1	1.6463	0.00011888
10970	CKAP4	1.6344	4.9511e-05
5329	PLAUR	1.627	0.00030226
56920	SEMA3G	1.6241	0.020027
11082	ESM1	1.6205	0.0023468
2828	GPR4	1.616	0.0095373
22801	ITGA11	1.6132	0.043793
1525	CXADR	1.612	0.0017374
5831	PYCR1	1.607	0.00023166
5021	OXTR	1.6041	5.7991e-05
30844	EHD4	1.6029	0.016132
302	ANXA2	1.5946	0.028199
144455	E2F7	1.5935	6.6617e-05
5054	SERPINE1	1.5896	0.0010432
5954	RCN1	1.5814	0.010934
23423	TMED3	1.5773	9.2448e-05
4680	CEACAM6	1.5635	0.036961
389792	IER5L	1.5579	9.1559e-05
7447	VSNL1	1.5576	9.2448e-05
4233	MET	1.5503	0.015838
27319	BHLHE22	1.5428	0.0012178
1948	EFNB2	1.5389	0.00010579
79586	CHPF	1.5317	0.00010579
3854	KRT6B	1.5112	0.00011592
633	BGN	1.5073	0.00011888
8870	IER3	1.5041	0.014715
10549	PRDX4	1.5026	0.00012924
135112	NCOA7	1.4986	0.00035358
3426	CFI	1.4971	0.0023503
26499	PLEK2	1.488	0.00015727
1048	CEACAM5	1.4782	0.0057951
3872	KRT17	1.4768	0.0019791
493869	GPX8	1.4766	0.024829
6282	S100A11	1.468	0.0016444
3934	LCN2	1.4656	0.001121
54997	TESC	1.4604	0.0018741
10309	CCNO	1.456	0.00065154
3692	EIF6	1.4512	0.000204
8553	BHLHE40	1.4503	0.0028935
80201	HKDC1	1.4472	0.017822
115701	ALPK2	1.4466	0.000204
4015	LOX	1.4466	0.000204
8772	FADD	1.4424	0.000204
114801	TMEM200A	1.4414	0.00024158
3382	ICA1	1.4403	0.0012239
144717	FAM109A	1.4348	0.00023166
5352	PLOD2	1.429	0.026557
94234	FOXQ1	1.4255	0.00025639
30850	CDR2L	1.4205	0.00028882
1800	DPEP1	1.4128	0.00026695
55612	FERMT1	1.4071	0.00030226
9955	HS3ST3A1	1.4062	0.0071817
84868	HAVCR2	1.3999	0.0079657
84561	SLC12A8	1.3979	0.00030226
22856	CHSY1	1.3969	0.00030226
3654	IRAK1	1.3957	0.00030226
11178	LZTS1	1.3954	0.00030226
10953	TOMM34	1.3909	0.018472
389336	C5orf46	1.3854	0.00037517
3673	ITGA2	1.3784	0.0083856
2769	GNA15	1.3689	0.00049933
26262	TSPAN17	1.3578	0.00049933
80131	LRRC8E	1.3541	0.018423
64778	FNDC3B	1.3539	0.039662
9446	GSTO1	1.3535	0.041833
833	CARS	1.3479	0.0071318
55075	UACA	1.3457	0.021862
79693	YRDC	1.3409	0.00067058
8862	APLN	1.3386	0.00061379
131578	LRRC15	1.3384	0.00067819
90407	TMEM41A	1.3362	0.00064679
6424	SFRP4	1.3359	0.0052851
1175	AP2S1	1.3167	0.00076991
81849	ST6GALNAC5	1.3161	0.00076463
861	RUNX1	1.3156	0.00082231
1192	CLIC1	1.3125	0.00083931
57761	TRIB3	1.3106	0.00088794
5862	RAB2A	1.3101	0.00080814
3170	FOXA2	1.3094	0.019899
57167	SALL4	1.3068	0.018005
51176	LEF1	1.3067	0.0070831
1469	CST1	1.3065	0.00087869
5420	PODXL	1.3019	0.002063
64285	RHBDF1	1.2992	0.00088794
171177	RHOV	1.2991	0.036878
53831	GPR84	1.2987	0.010866
25829	TMEM184B	1.296	0.0022561
1871	E2F3	1.2955	0.00092858
57228	SMAGP	1.2944	0.036878
11014	KDELR2	1.2849	0.0010492
6715	SRD5A1	1.2831	0.027001
23198	PSME4	1.2747	0.0011182
3455	IFNAR2	1.269	0.0013254
93109	TMEM44	1.267	0.0012989
1021	CDK6	1.2663	0.030742
7076	TIMP1	1.266	0.0018741
4846	NOS3	1.2648	0.0012491
5817	PVR	1.2635	0.0012989
51804	SIX4	1.2629	0.0012989
55048	VPS37C	1.2626	0.0018237
63875	MRPL17	1.2582	0.0013211
116835	HSPA12B	1.2581	0.0012989
4726	NDUFS6	1.2545	0.0013331
1611	DAP	1.252	0.0013599
5175	PECAM1	1.2506	0.0014105
7429	VIL1	1.2489	0.0013699
10268	RAMP3	1.2423	0.0014371
83475	DOHH	1.2342	0.0016041
126792	B3GALT6	1.2305	0.017822
5332	PLCB4	1.2305	0.023522
7291	TWIST1	1.2293	0.0051893
8535	CBX4	1.2269	0.0018741
3904	LAIR2	1.2268	0.0018575
6820	SULT2B1	1.2254	0.0017374
375061	FAM89A	1.2186	0.0018741
6307	MSMO1	1.2185	0.0018575
51768	TM7SF3	1.2185	0.0018741
3556	IL1RAP	1.2172	0.0018575
2296	FOXC1	1.2156	0.0019077
4854	NOTCH3	1.2138	0.0022561
79850	FAM57A	1.2109	0.0064928
79983	POF1B	1.2091	0.002016
444	ASPH	1.2077	0.018155
6690	SPINK1	1.2021	0.002016
90161	HS6ST2	1.1985	0.018155
10993	SDS	1.1981	0.0021557
92421	CHMP4C	1.1975	0.025194
6320	CLEC11A	1.1941	0.0023503
79759	ZNF668	1.1932	0.04393
2922	GRP	1.1919	0.0064928
253782	CERS6	1.1907	0.0022537
54602	NDFIP2	1.1874	0.0023468
1647	GADD45A	1.1868	0.0023503
94056	SYAP1	1.1862	0.035841
284186	TMEM105	1.1859	0.0024163
221079	ARL5B	1.1846	0.0026374
79652	TMEM204	1.1844	0.0023503
8323	FZD6	1.1805	0.034649
84790	TUBA1C	1.1797	0.0026374
124446	TMEM219	1.1771	0.038652
9470	EIF4E2	1.1735	0.043101
10395	DLC1	1.1725	0.0026172
2119	ETV5	1.1725	0.0026277
93663	ARHGAP18	1.1709	0.014457
7172	TPMT	1.1704	0.0026374
8407	TAGLN2	1.1629	0.0028298
140823	ROMO1	1.1629	0.029877
7171	TPM4	1.1551	0.0030892
79943	ZNF696	1.1535	0.0099802
3784	KCNQ1	1.1533	0.020368
84898	PLXDC2	1.1511	0.0033399
8038	ADAM12	1.1498	0.0033699
9097	USP14	1.1464	0.0034755
6509	SLC1A4	1.1453	0.0037636
29775	CARD10	1.144	0.043283
2161	F12	1.1365	0.0043031
9052	GPRC5A	1.134	0.0043135
29107	NXT1	1.132	0.0087261
9564	BCAR1	1.1318	0.0042739
2523	FUT1	1.1302	0.0042122
1893	ECM1	1.1302	0.0088204
10631	POSTN	1.1295	0.0041125
3110	MNX1	1.1289	0.0043098
9949	AMMECR1	1.1204	0.0051982
83442	SH3BGRL3	1.1201	0.020892
144501	KRT80	1.12	0.0045921
26747	NUFIP1	1.1165	0.0046841
81706	PPP1R14C	1.1147	0.0052174
5270	SERPINE2	1.1137	0.0049934
55033	FKBP14	1.1112	0.010866
9212	AURKB	1.109	0.0050878
79939	SLC35E1	1.1066	0.0054913
64841	GNPNAT1	1.1059	0.021022
92675	DTD1	1.1048	0.0051982
64943	NT5DC2	1.1026	0.028199
80270	HSD3B7	1.1019	0.0055925
80178	C16orf59	1.0956	0.012962
3383	ICAM1	1.0946	0.005763
2801	GOLGA2	1.0941	0.0086525
83483	PLVAP	1.0926	0.0062261
11226	GALNT6	1.0918	0.0059174
57333	RCN3	1.0912	0.011599
10205	MPZL2	1.0903	0.027456
11211	FZD10	1.087	0.0065831
636	BICD1	1.0863	0.0062893
5473	PPBP	1.0837	0.028161
4222	MEOX1	1.0823	0.0064928
1293	COL6A3	1.0821	0.0064928
2697	GJA1	1.08	0.0067035
7620	ZNF69	1.0791	0.0071773
11177	BAZ1A	1.0753	0.0068827
3623	INHA	1.0727	0.0071811
10478	SLC25A17	1.0713	0.035447
11335	CBX3	1.0708	0.041201
2987	GUK1	1.0706	0.0071773
80264	ZNF430	1.0679	0.0072027
4521	NUDT1	1.0676	0.0074217
4071	TM4SF1	1.0654	0.0076214
25907	TMEM158	1.0653	0.0074689
51371	POMP	1.0641	0.0074222
27439	CECR6	1.059	0.0079599
8986	RPS6KA4	1.0584	0.0080775
10907	TXNL4A	1.056	0.008383
3918	LAMC2	1.0536	0.0085333
114294	LACTB	1.053	0.0082699
5968	REG1B	1.0525	0.0084655
51400	PPME1	1.0523	0.0085333
6523	SLC5A1	1.0521	0.0083856
9655	SOCS5	1.0455	0.0088346
3068	HDGF	1.0454	0.0088504
7625	ZNF74	1.042	0.0092413
9610	RIN1	1.0408	0.0094139
1051	CEBPB	1.04	0.0092413
8273	SLC10A3	1.0387	0.0094565
8975	USP13	1.0364	0.01015
1265	CNN2	1.0351	0.0097976
6819	SULT1C2	1.0346	0.028199
65110	UPF3A	1.0337	0.0097976
2817	GPC1	1.033	0.0097976
84978	FRMD5	1.033	0.010073
7416	VDAC1	1.0329	0.013666
5268	SERPINB5	1.0322	0.010934
5898	RALA	1.0305	0.01015
7186	TRAF2	1.0278	0.041404
56950	SMYD2	1.0257	0.014481
25934	NIPSNAP3A	1.0248	0.011
5034	P4HB	1.0233	0.010866
92714	ARRDC1	1.0222	0.011799
3280	HES1	1.0219	0.010866
1820	ARID3A	1.0181	0.012103
2028	ENPEP	1.0165	0.011512
6631	SNRPC	1.0153	0.029609
116225	ZMYND19	1.0142	0.01193
3920	LAMP2	1.0122	0.011879
1196	CLK2	1.012	0.011864
57820	CCNB1IP1	1.0087	0.012455
131583	FAM43A	1.0081	0.012457
8718	TNFRSF25	1.0057	0.013035
2624	GATA2	1.0057	0.013129
5205	ATP8B1	1.0045	0.013823
84722	PSRC1	1.0038	0.012757
55920	RCC2	1.0037	0.013766
2512	FTL	1.0004	0.013129
56616	DIABLO	1.0004	0.033205
29113	C6orf15	0.99806	0.019028
7528	YY1	0.99288	0.014814
9997	SCO2	0.99277	0.015235
126017	ZNF813	0.99242	0.014708
389376	SFTA2	0.99205	0.015248
9882	TBC1D4	0.99164	0.014457
79751	SLC25A22	0.99058	0.015629
159090	FAM122B	0.99029	0.014615
50807	ASAP1	0.98977	0.014598
1364	CLDN4	0.98779	0.01502
1959	EGR2	0.98748	0.044404
9980	DOPEY2	0.98524	0.015133
64393	ZMAT3	0.98184	0.016012
89958	SAPCD2	0.98107	0.017217
4982	TNFRSF11B	0.98066	0.017493
85474	LBX2	0.97811	0.016138
8396	PIP4K2B	0.97615	0.019356
29844	TFPT	0.97406	0.017173
3916	LAMP1	0.9737	0.04309
9612	NCOR2	0.97277	0.016889
94081	SFXN1	0.97209	0.017822
7813	EVI5	0.97088	0.017672
353	APRT	0.97062	0.018005
375790	AGRN	0.97011	0.017493
3177	SLC29A2	0.96832	0.018155
10797	MTHFD2	0.96721	0.017555
627	BDNF	0.96478	0.032828
84334	APOPT1	0.96407	0.018304
5265	SERPINA1	0.96208	0.019229
3638	INSIG1	0.96151	0.019144
27230	SERP1	0.96096	0.018472
26986	PABPC1	0.95719	0.018885
339456	TMEM52	0.95645	0.019028
124583	CANT1	0.95564	0.019229
1478	CSTF2	0.95559	0.043608
219699	UNC5B	0.9539	0.01936
80303	EFHD1	0.95378	0.040984
153642	ARSK	0.95331	0.041404
24140	FTSJ1	0.95323	0.043816
79931	TNIP3	0.95243	0.019471
8409	UXT	0.95134	0.020027
84823	LMNB2	0.94615	0.021506
4688	NCF2	0.94534	0.038464
55027	HEATR3	0.94391	0.020965
63922	CHTF18	0.93719	0.022301
79101	TAF1D	0.93529	0.031191
54478	FAM64A	0.93189	0.024168
129080	EMID1	0.93076	0.036972
81931	ZNF93	0.93004	0.024269
3267	AGFG1	0.93002	0.025085
29085	PHPT1	0.92907	0.024666
1084	CEACAM3	0.92901	0.024746
57552	NCEH1	0.92813	0.031713
25825	BACE2	0.92758	0.024746
80176	SPSB1	0.92734	0.024829
55591	VEZT	0.92692	0.024604
3835	KIF22	0.92692	0.02476
2535	FZD2	0.92661	0.024829
11174	ADAMTS6	0.92442	0.026363
10952	SEC61B	0.92419	0.026604
1369	CPN1	0.92339	0.025252
10237	SLC35B1	0.923	0.027703
56951	C5orf15	0.91972	0.043101
6917	TCEA1	0.91875	0.026557
5879	RAC1	0.91719	0.027705
92106	OXNAD1	0.91658	0.027588
10791	VAMP5	0.91296	0.027456
4069	LYZ	0.91083	0.027599
144108	SPTY2D1	0.90917	0.028199
92359	CRB3	0.90907	0.028563
119391	GSTO2	0.909	0.029475
1437	CSF2	0.90887	0.028106
134265	AFAP1L1	0.90795	0.043351
6283	S100A12	0.90699	0.028161
5787	PTPRB	0.90478	0.029035
151306	GPBAR1	0.90425	0.028712
6512	SLC1A7	0.90387	0.029658
55722	CEP72	0.9033	0.028663
7329	UBE2I	0.90219	0.029101
8723	SNX4	0.90096	0.029475
440275	EIF2AK4	0.90079	0.029591
60412	EXOC4	0.89933	0.029877
81875	ISG20L2	0.89916	0.029724
10067	SCAMP3	0.89908	0.030165
3009	HIST1H1B	0.89749	0.030467
7264	TSTA3	0.89694	0.030467
6289	SAA2	0.89589	0.030174
7941	PLA2G7	0.89542	0.031052
5686	PSMA5	0.89388	0.031072
10195	ALG3	0.89324	0.030742
56901	NDUFA4L2	0.89296	0.031191
1595	CYP51A1	0.89246	0.031072
64127	NOD2	0.89224	0.047768
57111	RAB25	0.89053	0.033543
29803	REPIN1	0.8896	0.036695
2280	FKBP1A	0.88878	0.03294
53834	FGFRL1	0.8875	0.033623
4860	PNP	0.88697	0.034659
54480	CHPF2	0.8857	0.032649
475	ATOX1	0.88492	0.033205
2268	FGR	0.8841	0.034659
11079	RER1	0.88382	0.033205
83648	FAM167A	0.88264	0.033623
8549	LGR5	0.88213	0.034649
117177	RAB3IP	0.88116	0.034224
1397	CRIP2	0.87924	0.034106
51491	NOP16	0.87873	0.034491
25805	BAMBI	0.87452	0.039301
10056	FARSB	0.87284	0.036374
10945	KDELR1	0.87014	0.040152
92369	SPSB4	0.86935	0.038213
7162	TPBG	0.86738	0.038249
5436	POLR2G	0.86468	0.039351
132720	C4orf32	0.86428	0.039682
23219	FBXO28	0.85992	0.040152
7099	TLR4	0.85988	0.042006
11344	TWF2	0.85968	0.040043
10427	SEC24B	0.8594	0.040615
1040	CDS1	0.85645	0.043608
4831	NME2	0.84979	0.043816
57419	SLC24A3	0.84886	0.043852
28956	LAMTOR2	0.8487	0.044085
405753	DUOXA2	0.84857	0.04393
78990	OTUB2	0.84808	0.045654
11164	NUDT5	0.84669	0.045654
57834	CYP4F11	0.8455	0.045846
79962	DNAJC22	0.84314	0.046651
2352	FOLR3	0.84069	0.047585
55630	SLC39A4	0.84058	0.046913
3037	HAS2	0.84055	0.046201
51332	SPTBN5	0.84033	0.046983
7804	LRP8	0.84006	0.048087
8692	HYAL2	0.83927	0.048427
4893	NRAS	0.83907	0.047128
55355	HJURP	0.8345	0.049639

## Sheet: Table S3
Table S3: Downregulated genes in colon tumor stroma versus colon normal stroma
Entrez ID	Symbol	Combined effect size (ES)	adjusted p-value
9499	MYOT	-2.4396	4.6024e-09
730	C7	-2.2361	0.00030226
2788	GNG7	-2.1023	0.00011592
389337	ARHGEF37	-2.0533	3.7752e-07
443	ASPA	-1.8314	7.0962e-06
596	BCL2	-1.8103	0.0013211
28968	SLC6A16	-1.7814	1.2361e-05
340533	KIAA2022	-1.7381	1.3805e-05
5990	RFX2	-1.7315	0.0051982
6430	SRSF5	-1.73	1.3866e-05
5166	PDK4	-1.7299	0.0017655
352954	GATS	-1.7053	0.0012178
51585	PCF11	-1.6322	0.021862
5348	FXYD1	-1.6141	0.00013673
23492	CBX7	-1.6136	4.9511e-05
25840	METTL7A	-1.6125	5.6808e-05
2258	FGF13	-1.6049	0.026557
57161	PELI2	-1.5631	9.2448e-05
146556	C16orf89	-1.5557	0.0081072
221016	CCDC7	-1.5557	0.033623
79645	EFCAB1	-1.5493	9.2448e-05
88455	ANKRD13A	-1.5454	9.3973e-05
338872	C1QTNF9	-1.541	9.7188e-05
7111	TMOD1	-1.5315	0.002141
6414	SEPP1	-1.5252	0.00010579
167838	TXLNB	-1.5193	0.00011299
55273	TMEM100	-1.5044	0.00011592
10891	PPARGC1A	-1.5023	0.00011888
84940	CORO6	-1.4983	0.0005427
83417	FCRL4	-1.486	0.0064928
122773	KLHDC1	-1.4776	0.00015575
285195	SLC9A9	-1.4757	0.00014675
922	CD5L	-1.4756	0.00015366
23635	SSBP2	-1.4719	0.0018431
284654	RSPO1	-1.4651	0.0030919
23171	GPD1L	-1.46	0.00017368
10628	TXNIP	-1.4583	0.0018237
2272	FHIT	-1.4568	0.000204
220108	FAM124A	-1.4425	0.00021326
9892	SNAP91	-1.4404	0.00022932
9745	ZNF536	-1.4373	0.00020841
124626	ZPBP2	-1.4326	0.028161
79632	FAM184A	-1.4315	0.00086424
9764	KIAA0513	-1.4224	0.0019667
51277	DNAJC27	-1.4186	0.00030226
4129	MAOB	-1.4151	0.0018741
55187	VPS13D	-1.4011	0.044762
57556	SEMA6A	-1.3962	0.0039604
5593	PRKG2	-1.3947	0.027588
32	ACACB	-1.3933	0.0068385
2781	GNAZ	-1.3844	0.00044206
9760	TOX	-1.3789	0.028712
79661	NEIL1	-1.3788	0.037362
1408	CRY2	-1.3747	0.027008
55259	CASC1	-1.3594	0.0046805
7957	EPM2A	-1.3531	0.0015789
10590	SCGN	-1.3422	0.0026862
30818	KCNIP3	-1.3351	0.0035648
680	BRS3	-1.3322	0.00064679
3817	KLK2	-1.3315	0.00086424
604	BCL6	-1.3189	0.0011182
54769	DIRAS2	-1.3137	0.0022748
96459	FNIP1	-1.3062	0.00083978
5140	PDE3B	-1.3045	0.0009019
401024	FSIP2	-1.2959	0.027096
122622	ADSSL1	-1.2882	0.008118
23632	CA14	-1.2848	0.0011049
6387	CXCL12	-1.2789	0.0011049
152404	IGSF11	-1.2701	0.0012989
10090	UST	-1.2694	0.0012491
7275	TUB	-1.2671	0.0012406
23580	CDC42EP4	-1.2619	0.018155
8816	DCAF5	-1.2614	0.0013211
5028	P2RY1	-1.2577	0.0012989
64577	ALDH8A1	-1.251	0.0036457
23114	NFASC	-1.2432	0.0014105
8787	RGS9	-1.2414	0.019404
5602	MAPK10	-1.2391	0.0098497
9310	ZNF235	-1.2346	0.0015547
64753	CCDC136	-1.229	0.0019077
5144	PDE4D	-1.2274	0.047684
9715	FAM131B	-1.2249	0.0018741
345778	MTX3	-1.2242	0.0017755
25789	TMEM59L	-1.2211	0.019831
83539	CHST9	-1.2178	0.0018626
58155	PTBP2	-1.2164	0.0019809
2110	ETFDH	-1.2147	0.0019017
847	CAT	-1.212	0.021506
55063	ZCWPW1	-1.2068	0.0019896
163131	ZNF780B	-1.2056	0.012606
80333	KCNIP4	-1.2012	0.0021363
4884	NPTX1	-1.1943	0.023467
3745	KCNB1	-1.1908	0.039559
27239	GPR162	-1.1849	0.0024253
5745	PTH1R	-1.1829	0.0023503
8909	ENDOU	-1.1804	0.0024163
81571	MIR600HG	-1.1799	0.024829
1181	CLCN2	-1.1787	0.0024253
1010	CDH12	-1.1782	0.0047259
9667	SAFB2	-1.1772	0.0025929
118429	ANTXR2	-1.1692	0.0027179
9852	EPM2AIP1	-1.1681	0.0030919
340419	RSPO2	-1.1676	0.0030152
56899	ANKS1B	-1.1673	0.0028298
353189	SLCO4C1	-1.1664	0.044442
84073	MYCBPAP	-1.1652	0.021862
472	ATM	-1.1581	0.0030919
131034	CPNE4	-1.1507	0.028175
287	ANK2	-1.1469	0.0039604
5152	PDE9A	-1.1428	0.043205
9910	RABGAP1L	-1.1381	0.0037418
116173	CMTM5	-1.127	0.0042285
84417	C2orf40	-1.1226	0.020521
171019	ADAMTS19	-1.1141	0.0050726
115209	OMA1	-1.114	0.0052131
79891	ZNF671	-1.1105	0.0049934
2273	FHL1	-1.1102	0.032292
57569	ARHGAP20	-1.1094	0.0050902
1136	CHRNA3	-1.1084	0.0051893
84976	DISP1	-1.1083	0.0054913
202018	TAPT1	-1.1082	0.0050878
161823	ADAL	-1.1043	0.0052382
168433	RNF133	-1.1033	0.0055129
80258	EFHC2	-1.0944	0.032292
51385	ZNF589	-1.093	0.0063874
1767	DNAH5	-1.0916	0.0080128
6425	SFRP5	-1.0853	0.0064304
84696	ABHD1	-1.0812	0.0064928
10612	TRIM3	-1.0788	0.0069984
1130	LYST	-1.0773	0.0067035
6014	RIT2	-1.0756	0.0069809
4128	MAOA	-1.0751	0.0071773
9465	AKAP7	-1.0746	0.0072027
5158	PDE6B	-1.069	0.0071847
1380	CR2	-1.0688	0.0071773
2949	GSTM5	-1.0648	0.0074689
23671	TMEFF2	-1.0622	0.041988
23387	SIK3	-1.0619	0.0079657
1269	CNR2	-1.0612	0.046495
3590	IL11RA	-1.0591	0.0082288
10632	ATP5L	-1.0586	0.040332
23077	MYCBP2	-1.0583	0.0079599
3021	H3F3B	-1.0583	0.012652
5608	MAP2K6	-1.0578	0.0079657
5764	PTN	-1.0559	0.008198
79745	CLIP4	-1.0542	0.040571
9194	SLC16A7	-1.0523	0.008323
6595	SMARCA2	-1.0522	0.014457
22	ABCB7	-1.0475	0.012652
60370	AVPI1	-1.0464	0.0086525
79591	C10orf76	-1.042	0.033623
223117	SEMA3D	-1.0417	0.0094139
9252	RPS6KA5	-1.0388	0.015465
7596	ZNF45	-1.0388	0.031191
114885	OSBPL11	-1.0387	0.0095373
89894	TMEM116	-1.0374	0.025606
4714	NDUFB8	-1.0361	0.01015
9878	TOX4	-1.032	0.030147
123970	C16orf78	-1.0302	0.010083
1496	CTNNA2	-1.0275	0.010406
55843	ARHGAP15	-1.0265	0.025147
57536	KIAA1328	-1.0261	0.011043
10868	USP20	-1.0256	0.010659
55628	ZNF407	-1.0213	0.028161
80274	SCUBE1	-1.0205	0.011178
9527	GOSR1	-1.02	0.011188
64066	MMP27	-1.014	0.033623
497049	FLJ25758	-1.0135	0.011864
64111	NPVF	-1.0118	0.018885
26277	TINF2	-1.0107	0.012443
83890	SPATA9	-1.0075	0.012482
57343	ZNF304	-1.0044	0.013129
81553	FAM49A	-0.99975	0.013666
65217	PCDH15	-0.99775	0.013666
157697	ERICH1	-0.99714	0.01409
54899	PXK	-0.99679	0.04318
1393	CRHBP	-0.99309	0.031538
57379	AICDA	-0.98846	0.014777
80318	GKAP1	-0.98665	0.015031
635	BHMT	-0.98571	0.01515
493861	EID3	-0.98545	0.026232
1501	CTNND2	-0.98118	0.015629
165679	SPTSSB	-0.98006	0.021309
8648	NCOA1	-0.97954	0.017201
7549	ZNF2	-0.97746	0.016622
677	ZFP36L1	-0.97691	0.017158
54893	MTMR10	-0.97609	0.016799
55879	GABRQ	-0.97607	0.016702
9927	MFN2	-0.97491	0.017173
83850	ESYT3	-0.97445	0.017201
2327	FMO2	-0.97334	0.017493
283171	C11orf44	-0.9727	0.018462
26033	ATRNL1	-0.97205	0.017173
91782	CHMP7	-0.96785	0.019229
6778	STAT6	-0.96779	0.04393
50674	NEUROG3	-0.96526	0.017822
91746	YTHDC1	-0.96485	0.018462
5997	RGS2	-0.96479	0.01822
645	BLVRB	-0.96432	0.01807
143879	KBTBD3	-0.96157	0.018885
2822	GPLD1	-0.9612	0.018462
163255	ZNF540	-0.95952	0.018818
10864	SLC22A7	-0.95762	0.019688
388335	TMEM220	-0.95724	0.038083
9706	ULK2	-0.95633	0.020364
147463	ANKRD29	-0.95236	0.019857
5287	PIK3C2B	-0.95188	0.022057
1185	CLCN6	-0.9511	0.021022
2622	GAS8	-0.94478	0.042839
6462	SHBG	-0.94304	0.021309
10786	SLC17A3	-0.94189	0.021862
7504	XK	-0.94095	0.022295
9900	SV2A	-0.94052	0.021885
9101	USP8	-0.93952	0.036089
1489	CTF1	-0.93558	0.022761
201456	FBXO15	-0.93447	0.023467
10714	POLD3	-0.93349	0.022968
23294	ANKS1A	-0.93064	0.026063
84631	SLITRK2	-0.93023	0.024211
23523	CABIN1	-0.92554	0.024829
9139	CBFA2T2	-0.92389	0.027227
81035	COLEC12	-0.92364	0.02637
6330	SCN4B	-0.92266	0.025574
6750	SST	-0.92235	0.02637
284131	ENDOV	-0.92181	0.025486
130026	ICA1L	-0.91989	0.026557
26211	OR2F1	-0.91845	0.027008
9063	PIAS2	-0.9183	0.028161
399665	FAM102A	-0.918	0.026495
79689	STEAP4	-0.91787	0.026543
10164	CHST4	-0.91676	0.026604
619279	ZNF704	-0.91527	0.027703
43	ACHE	-0.91306	0.028397
57546	PDP2	-0.91279	0.028199
285668	C5orf64	-0.91207	0.027703
27091	CACNG5	-0.91182	0.02792
90799	CEP95	-0.91021	0.028161
117157	SH2D1B	-0.9066	0.031579
171484	FAM9C	-0.90652	0.028199
401052	LOC401052	-0.90637	0.030154
347731	LRRTM3	-0.90617	0.028199
7391	USF1	-0.90609	0.029546
27181	SIGLEC8	-0.90475	0.028563
10795	ZNF268	-0.90222	0.029609
25949	SYF2	-0.90186	0.031402
252983	STXBP4	-0.90135	0.029546
400720	ZNF772	-0.90061	0.029307
10297	APC2	-0.89861	0.030003
10449	ACAA2	-0.89805	0.029877
285313	IGSF10	-0.89701	0.030147
23373	CRTC1	-0.89415	0.032292
23017	FAIM2	-0.89389	0.03068
158293	FAM120AOS	-0.89223	0.033623
139135	PASD1	-0.89015	0.031901
79603	CERS4	-0.88987	0.032442
79066	METTL16	-0.88919	0.032292
64744	SMAP2	-0.88764	0.03226
83593	RASSF5	-0.88582	0.0332
3713	IVL	-0.88538	0.0332
79324	OR51G1	-0.88403	0.034366
285154	CYP1B1-AS1	-0.88362	0.033117
6550	SLC9A3	-0.88148	0.033747
93058	COQ10A	-0.878	0.036089
7047	TGM4	-0.87462	0.036089
51386	EIF3L	-0.87326	0.036874
23098	SARM1	-0.87186	0.037362
10235	RASGRP2	-0.87131	0.037429
10231	RCAN2	-0.86992	0.039301
841	CASP8	-0.8669	0.037961
3859	KRT12	-0.86619	0.038652
165140	OXER1	-0.86615	0.039786
119687	OR51A7	-0.86437	0.040043
79870	BAALC	-0.86355	0.039775
23566	LPAR3	-0.86209	0.039877
57687	VAT1L	-0.86089	0.041
339302	CPLX4	-0.86026	0.040028
80325	ABTB1	-0.85652	0.042114
4485	MST1	-0.85366	0.042006
1788	DNMT3A	-0.8533	0.043177
83659	TEKT1	-0.85315	0.042851
7375	USP4	-0.85299	0.045654
140883	ZNF280B	-0.84991	0.043608
57017	COQ9	-0.84945	0.043852
22909	FAN1	-0.84923	0.044442
26065	LSM14A	-0.84897	0.046197
4490	MT1B	-0.84886	0.043608
55809	TRERF1	-0.847	0.044395
84329	HVCN1	-0.84633	0.046197
146057	TTBK2	-0.8444	0.045688
9924	PAN2	-0.84403	0.047087
10930	APOBEC2	-0.84141	0.046651
8738	CRADD	-0.83967	0.047684
3578	IL9	-0.83773	0.049752
2570	GABRR2	-0.83738	0.047857
2051	EPHB6	-0.83623	0.04861

## Sheet: Table S4
Table S4. Top 10 upregulated and top 10 downregulated genes in colon tumor stroma
Class	Rank based on combined Effect Size(ES)	Entrez ID	Symbol	Name	GSE31279		GSE35602		GSE46824		Combined ES
					log2(fold change)	adjusted p-value	log2(fold change)	adjusted p-value	log2(fold change)	adjusted p-value	ES	adjusted p-value
Upregulated	1	115908	CTHRC1	collagen triple helix repeat containing 1	2.6198	0.003315	2.855	0.002589	1.8223	0.0030025	2.268	0.0014105
	2	9603	NFE2L3	nuclear factor, erythroid 2 like 3	0.93613	0.058108	1.459	0.0015334	1.2334	1.5835e-05	2.2357	0.00030226
	3	23213	SULF1	sulfatase 1	1.644	0.087485	2.9119	0.00037794	2.0403	0.00034995	2.1761	0.016976
	4	6662	SOX9	SRY-box 9	1.1923	0.046318	1.4577	0.0018008	1.2776	0.00021728	2.0541	0.00010579
	5	8507	ENC1	ectodermal-neural cortex 1	1.7229	0.012605	1.1649	0.029142	1.8753	7.5131e-05	2.0531	3.7752e-07
	6	595	CCND1	cyclin D1	0.83242	0.031505	1.3345	0.0013647	0.8682	0.00099908	2.0363	0.00064679
	7	1462	VCAN	versican	2.0795	0.0051337	2.0476	0.0084893	1.6409	0.0025692	2.0003	2.0265e-05
	8	27253	PCDH17	protocadherin 17	0.62971	0.15127	1.1505	0.0096909	1.0013	1.63e-05	1.9266	0.0018626
	9	9037	SEMA5A	semaphorin 5A	0.90202	0.10776	1.1968	0.0079302	1.5546	6.5131e-05	1.8928	0.0001364
	10	255877	BCL6B	B-cell CLL/lymphoma 6B	0.77256	0.025116	1.0016	0.0023439	0.66094	0.0052429	1.8901	0.0017374
Downregulated	1	9499	MYOT	myotilin	-1.6248	0.003315	-1.859	0.0033209	-1.045	7.0452e-05	-2.4396	4.6024e-09
	2	730	C7	complement C7	-1.9334	0.003315	-0.74639	0.1379	-2.0043	2.3472e-06	-2.2361	0.00030226
	3	2788	GNG7	G protein subunit gamma 7	-1.5019	0.038349	-1.9056	0.0014355	-1.3199	0.00021878	-2.1023	0.00011592
	4	389337	ARHGEF37	Rho guanine nucleotide exchange factor 37	-0.99108	0.0097752	-0.77811	0.038308	-0.80566	8.0811e-05	-2.0533	3.7752e-07
	5	443	ASPA	aspartoacylase	-1.182	0.087528	-1.6555	0.02136	-1.9542	6.2707e-05	-1.8314	7.0962e-06
	6	596	BCL2	BCL2, apoptosis regulator	-0.46438	0.080366	-0.61417	0.097544	-0.8921	4.9941e-06	-1.8103	0.0013211
	7	28968	SLC6A16	solute carrier family 6 member 16	-1.3158	0.011165	-0.84352	0.064444	-1.0485	0.00095792	-1.7814	1.2361e-05
	8	340533	KIAA2022	KIAA2022	-0.69385	0.035646	-0.78949	0.05804	-0.54359	0.00038662	-1.7381	1.3805e-05
	9	5990	RFX2	regulatory factor X2	-1.2059	0.0073842	-1.0046	0.015579	-0.65628	0.02549	-1.7315	0.0051982
	10	6430	SRSF5	serine and arginine rich splicing factor 5	-0.70671	0.024752	-0.75591	0.032333	-0.68064	0.0014453	-1.73	1.3866e-05

## Sheet: Table S5
Table S5. 44 KEGG pathways that were significantly associated with the upregulated genes in colon tumor stroma (CTS)
Pathway	# Genes in Gene Set (K)	# Genes in Overlap (k)	k/K	p-value	FDR q-value
Pathways in cancer	328	16	0.0488	3.29e-08	6.12e-06
p53 signaling pathway	69	6	0.087	2.91e-05	0.00206
Glycosaminoglycan biosynthesis - chondroitin sulfate	22	4	0.1818	3.44e-05	0.00206
Wnt signaling pathway	151	8	0.053	5.2e-05	0.00206
Focal adhesion	201	9	0.0448	6.63e-05	0.00206
Leukocyte transendothelial migration	118	7	0.0593	7.52e-05	0.00206
ECM-receptor interaction	84	6	0.0714	8.85e-05	0.00206
Small cell lung cancer	84	6	0.0714	8.85e-05	0.00206
Vibrio cholerae infection	56	5	0.0893	0.00012	0.00245
Axon guidance	129	7	0.0543	0.000132	0.00245
Melanogenesis	102	6	0.0588	0.000258	0.00435
Complement and coagulation cascades	69	5	0.0725	0.000324	0.00491
Pancreatic cancer	70	5	0.0714	0.000346	0.00491
Melanoma	71	5	0.0704	0.00037	0.00491
Chronic myeloid leukemia	73	5	0.0685	0.00042	0.00521
Purine metabolism	159	7	0.044	0.000472	0.00549
Endocytosis	183	7	0.0383	0.00108	0.0104
Cell adhesion molecules (CAMs)	134	6	0.0448	0.00109	0.0104
Huntington's disease	185	7	0.0378	0.00115	0.0104
Non-small cell lung cancer	54	4	0.0741	0.0012	0.0104
Natural killer cell mediated cytotoxicity	137	6	0.0438	0.00122	0.0104
Maturity onset diabetes of the young	25	3	0.12	0.00125	0.0104
Basal cell carcinoma	55	4	0.0727	0.00129	0.0104
Glycosaminoglycan biosynthesis - heparan sulfate	26	3	0.1154	0.0014	0.0109
Acute myeloid leukemia	60	4	0.0667	0.00178	0.0132
Toll-like receptor signaling pathway	102	5	0.049	0.00191	0.0133
Thyroid cancer	29	3	0.1034	0.00194	0.0133
Glioma	65	4	0.0615	0.00239	0.0158
Viral myocarditis	73	4	0.0548	0.00364	0.0233
Adherens junction	75	4	0.0533	0.00401	0.0248
Arrhythmogenic right ventricular cardiomyopathy (ARVC)	76	4	0.0526	0.0042	0.0252
Neurotrophin signaling pathway	126	5	0.0397	0.00473	0.0275
Bladder cancer	42	3	0.0714	0.0056	0.0316
Tight junction	134	5	0.0373	0.00612	0.0328
Chemokine signaling pathway	190	6	0.0316	0.00617	0.0328
Apoptosis	88	4	0.0455	0.00705	0.0364
Prostate cancer	89	4	0.0449	0.00733	0.0366
Gap junction	90	4	0.0444	0.00762	0.0366
Notch signaling pathway	47	3	0.0638	0.00767	0.0366
Proteasome	48	3	0.0625	0.00813	0.0378
Cytokine-cytokine receptor interaction	267	7	0.0262	0.00861	0.039
Endometrial cancer	52	3	0.0577	0.0101	0.0442
Pyrimidine metabolism	98	4	0.0408	0.0102	0.0442
Regulation of actin cytoskeleton	216	6	0.0278	0.0112	0.0474

## Sheet: Table S6
Table S6. Upstream transcription factors and kinases regulating the differentially-expressed genes between colon tumor stroma and normal stroma
Protein Kinase				Transcription Factor
Rank	Protein Kinase	Hypergeometric p-value		Rank	Transcription Factor	Hypergeometric p-value
1	MAPK14	3.280e-24		1	SUZ12	1.956e-05
2	CDK1	9.348e-24		2	NFE2L2	0.0003376
3	CSNK2A1	5.385e-23		3	RUNX1	0.002451
4	MAPK1	4.655e-21		4	ESR1	0.003095
5	CDK4	8.655e-19		5	STAT3	0.004137
6	MAPK3	7.970e-18		6	TCF3	0.005255
7	CDK2	2.999e-17		7	FOSL2	0.009654
8	GSK3B	1.103e-16		8	SALL4	0.01034
9	HIPK2	2.438e-16		9	AR	0.01329
10	ERK1	3.404e-16		10	SMC3	0.02395
11	AKT1	1.552e-14		11	SOX2	0.04293
12	MAPK8	1.979e-14
13	ERK2	2.408e-14
14	JNK1	3.154e-12
15	CK2ALPHA	3.410e-12
16	PKBALPHA	4.787e-11
17	RPS6KA3	8.663e-11
18	ABL1	1.024e-10
19	GSK3BETA	1.699e-10
20	DNAPK	5.293e-10
21	MAP2K1	1.289e-9
22	PRKCA	2.489e-9
23	CDC2	3.485e-9
24	SRC	1.062e-8
25	GSK3ALPHA	1.466e-8
26	PRKDC	7.263e-8
27	GSK	8.064e-8
28	CSNK2A2	8.598e-8
29	CK2	1.224e-7
30	PRKACA	1.789e-7
31	TGFBR2	2.144e-7
32	PRKCB	7.093e-7
33	CHUK	7.097e-7
34	ATM	7.489e-7
35	PRKCD	9.073e-7
36	MAPK9	1.11e-06
37	IKK	1.656e-06
38	EGFR	1.869e-06
39	RAF1	2.965e-06
40	MAPK10	4.637e-06
41	CDK5	9.886e-06
42	IKKALPHA	1.16e-05
43	PKBBETA	2.272e-05
44	GSK3A	3.13e-05
45	JNK2	4.153e-05
46	ERBB2	4.27e-05
47	MAPK11	8.065e-05
48	IKBKB	8.306e-05
49	CSNK1E	8.732e-05
50	RET	8.897e-05
51	CK2A2	9.493e-05
52	IKKBETA	0.0002273
53	RPS6KA1	0.0003481
54	PKBGAMMA	0.0003895
55	PIM1	0.0004174
56	PRKCZ	0.0004191
57	CDK6	0.0004395
58	CDK3	0.0005531
59	PKD1	0.0007598
60	CDK9	0.0007603
61	CHEK1	0.0008079
62	DYRK2	0.001219
63	PKR	0.001572
64	MTOR	0.001843
65	PKCIOTA	0.001843
66	INSR	0.002133
67	CAM	0.002206
68	TBK1	0.002248
69	IKBKE	0.002368
70	PKC	0.002368
71	AURORAA	0.002623
72	CHEK2	0.002661
73	MAP2K4	0.003048
74	CK1ALPHA	0.003189
75	JAK2	0.003255
76	MOK	0.003828
77	CDK8	0.004636
78	DNA	0.005089
79	AKT2	0.005269
80	PRKACB	0.005538
81	FER	0.006026
82	MAP3K5	0.008232
83	PDHK1	0.008781
84	ALK	0.00949
85	PKAALPHA	0.009526
86	BRD2	0.01
87	TYK2	0.01007
88	CDK7	0.011
89	PAK1	0.01127
90	PDGFRBETA	0.01158
91	DYRK1A	0.01233
92	ABL2	0.01233
93	RPS6KA5	0.01233
94	ATR	0.01282
95	CAMK2A	0.01407
96	PKCEPSILON	0.01411
97	PKC	0.01463
98	AURKA	0.01526
99	MAPK12	0.01646
100	PKCALPHA	0.01681
101	MAP2K3	0.01835
102	PKCTHETA	0.02135
103	FOXO3	0.02189
104	PIKFYVE	0.02189
105	ACVR2B	0.02196
106	PKA	0.02398
107	HIPK1	0.02825
108	PKAGAMMA	0.02933
109	ERBB3	0.02933
110	MERTK	0.03049
111	PRKAA1	0.03276
112	PIM2	0.03518
113	EPHA8	0.03518
114	MAP3K8	0.03867
115	PRKG1	0.04012
116	PRKG2	0.04012
117	CLK2	0.04012
118	BTK	0.04159
119	TNK2	0.04268
120	DYRK1B	0.04531
121	PTK6	0.04531
122	CAMK4	0.04531
123	MAPK7	0.04531
124	EEF2K	0.04799

## Sheet: Table S7
Table S7. Master metabolic transcriptional regulators (MMTRs) (iRegulon normalized enrichment score NES > 3.0) regulating the differentially-expressed genes between colon tumor stroma and normal stroma
A. MMTRs (iRegulon normalized enrichment score NES > 3.0) regulating the upregulated genes in colon tumor stroma
Rank	MMTRs	NES	Targets	Motifs/Tracks
1	HNF1A	3.938	51	4
2	NFKB1	3.658	66	4
3	ZBTB7A	3.613	145	1
4	ATF6	3.521	163	3
5	TEAD4	3.323	47	1
6	TFAP2B	3.305	137	7
7	JAZF1	3.167	41	3
8	FNTB	3.072	153	4
9	EP300	3.035	28	1
B. MMTRs (iRegulon normalized enrichment score NES > 3.0) regulating the downregulated genes in colon tumor stroma
Rank	MMTRs	NES	Targets	Motifs/Tracks
1	PKNOX2	4.142	131	9
2	GATA2	4.084	12	1
3	MAPK10	3.963	67	8
4	TEAD1	3.818	42	1
5	TOX	3.713	25	5
6	MEF2A	3.657	23	1
7	GATA5	3.34	73	3
8	ELK1	3.33	14	1
9	MAZ	3.091	15	1
10	NHLH1	3.08	19	2
11	ATF1	3.022	32	1
12	RAD21	3.019	25	1

## Sheet: Table S8
Table S8. Hub genes in the protein-protein interaction network of the differentially-expressed genes between colon tumor stroma and normal stroma
Symbol	Degree	Betweenness
CEBPB	12	1960.02
UBE2I	11	2014.33
BCL6	10	1503.56
PAN2	9	1044
TRAF2	8	1666.51
RUNX1	8	1305.17
FTSJ1	7	1140.87
USP8	6	828.16
CASP8	5	1161.72
BCL2	5	1144.22
EIF6	5	1134.49
GJA1	5	961.75
STAT6	5	873.38
YY1	5	770.08
RCC2	5	686.29
NCOA1	5	639.68
CCND1	5	602.86
H3F3A	5	496.43
USF1	5	471.98
HDGF	5	436.57
PABPC1	4	1571.02
PIAS2	4	1437.27
P4HB	4	1435.76
ANXA2	4	1295.77
NCOR2	4	1011.77
VDAC1	4	964.19
IRAK1	4	907
PTN	4	779
PPARGC1A	4	586.52
DNMT3A	4	427.35
RAC1	4	399
CDK6	4	280.14
GADD45A	4	267
CSF2	3	1218.97
FADD	3	1016
SRSF5	3	284.16
DIABLO	3	267
USP4	3	267
SMARCA2	3	267
PPME1	3	267
LEF1	3	238.94
NOS3	3	234.52
FARSB	3	210.43
CBX4	3	134
FTL	3	134
IL1RAP	2	524
RCN1	2	524
ACAA2	2	399
TSTA3	2	396
HES1	2	266
SERPINE1	2	197.94
HIST1H1B	2	165.43
E2F3	2	151.99
AURKB	2	134
FHL1	2	134
FKBP1A	2	134
RALA	2	134
ICAM1	2	134
CEACAM5	2	134
ZNF407	2	134
CKAP4	2	134
NUDT5	2	84.06
CBX3	2	70.98
FHIT	2	67.74
SSBP2	2	0
BAZ1A	1	0
UXT	1	0
PNP	1	0
ULK2	1	0
BHLHE40	1	0
TRIB3	1	0
MAPK10	1	0
USP13	1	0
EPHB6	1	0
NDUFS6	1	0
APRT	1	0
TAGLN2	1	0
PLOD2	1	0
MYCBP2	1	0
EFHD1	1	0
CXADR	1	0
RCN3	1	0
CHMP7	1	0
EIF4E2	1	0
CBFA2T2	1	0
IFNAR2	1	0
UACA	1	0
NT5DC2	1	0
PELI2	1	0
AGFG1	1	0
MAP2K6	1	0
TOX4	1	0
EGR2	1	0
PDE4D	1	0
NOD2	1	0
TLR4	1	0
GZMB	1	0
ZMAT3	1	0
GATA2	1	0
CHMP4C	1	0
SAA2	1	0
SPINK1	1	0
FOXA2	1	0
ASPH	1	0
RNF133	1	0
AICDA	1	0
TXNIP	1	0
BCL6B	1	0
POLD3	1	0
TAF1D	1	0
CABIN1	1	0
AKAP7	1	0
TPM4	1	0
LMNB2	1	0
TFPT	1	0
NCF2	1	0
TNFRSF25	1	0
KCNIP3	1	0
CR2	1	0
CTNNA2	1	0
CLK2	1	0
NRAS	1	0
HSD3B7	1	0
CEACAM6	1	0
PTBP3	1	0
TWF2	1	0
LAMC2	1	0
CNN2	1	0
SERPINE2	1	0
FBXO28	1	0
C1QTNF9	1	0
EVI5	1	0
ARHGAP15	1	0
LCN2	1	0
TMOD1	1	0
PYCR1	1	0

## Sheet: Table S9
Table S9. Overlapping genes between the DEGs between colon tumor stroma and normal stroma, and their upstream regulators, and the DEGs between high-stroma-content and low-stroma-content colon cancers
Overlapping genes between upregulated DEGs (colon tumor stroma vs. colon normal stroma) and upregulated DEGs (high-stroma-content vs. low-stroma-content colon cancers)	Overlapping genes between downregulated DEGs (colon tumor stroma vs. colon normal stroma) and downregulated DEGs (high-stroma-content vs. low-stroma-content colon cancers)	Overlaping upstream TFs in the upregulated DEGs between high-stroma-content and low-stroma-content colon cancers	Overlaping upstream TFs in the downregulated DEGs between high-stroma-content and low-stroma-content colon cancers	Overlaping upstream kinases in the upregulated DEGs between high-stroma-content and low-stroma-content colon cancers	Overlaping upstream kinases in the downregulated DEGs between high-stroma-content and low-stroma-content colon cancers	Overlaping MMTRs in the upregulated DEGs between high-stroma-content and low-stroma-content colon cancers	Overlaping MMTRs in the downregulated DEGs between high-stroma-content and low-stroma-content colon cancers
C6orf15	COQ9	STAT3	TCF3	RPS6KA5	CDK1	PKNOX2	HNF1A
PPBP	LOC401052	FOSL2	NFE2L2	BTK	CHEK1	EP300	TEAD4
SEMA3G	PPARGC1A	ESR1		JAK2	CLK2	TFAP2B	MAZ
BICD1	NDUFB8	SOX2		MAP2K4	CDK4	JAZF1
ARSK	BLVRB	SALL4		EGFR	MAPK3	NFKB1
KRT80	CA14	RUNX1		MAPK11	ATR	TEAD1
C4orf32	PAN2			MAPK14	CDK7	MAPK10
ENPEP	CLCN2			MAP3K8	CHEK2	GATA2
BHLHE40	MST1			TGFBR2	CDK2	TOX
GPR84	OMA1			PIKFYVE	MAPK9	MEF2A
SULF1	TMEM116			MAPK1	PAK1	GATA5
FNDC3B	MIR600HG			MAPK8	AURKA	ATF6
BCL6B	CDH12			BRD2	PRKCZ
NCOA7	FHIT			PRKACA	RPS6KA1
CHPF	SLC22A7			PIM1	CDK3
TWIST1	POLD3			PRKG1	CDK5
ALPK2	AKAP7			HIPK1	PTK6
FZD2	MAP2K6			PRKCB	RPS6KA3
TNFRSF11B	CEP95			MAPK10
LEF1	XK			MAPK7
FAM167A	NEIL1			EEF2K
PECAM1	GPD1L			PKD1
VPS37C	ATP5L			ABL2
NOS3	GKAP1			MAP3K5
FAM43A	GAS8			PRKG2
CECR6	AVPI1			MERTK
KRT6B	ETFDH			RET
NOTCH3				DYRK2
TMEM200A				ATM
PIP4K2B				CAMK2A
AFAP1L1				INSR
NUAK1				FOXO3
C5orf46				MAPK12
HAS2				TYK2
RAMP3				FER
CDR2L				CAMK4
PLOD2				PIM2
SDS				ALK
CNN2				MTOR
GADD45A				DYRK1B
HSPA12B
SLC35E1									18
VAMP5
LOX
SPSB4
LAMP2
LAMC2
SPSB1
LYZ
INHA
CLDN1
SLC24A3
HAVCR2
PLAUR
LACTB
MEOX1
LAIR2
BDNF
EFHD1
PTPRB
EVI5
ECM1
NDUFA4L2
TWF2
GNA15
SFRP4
IL1RAP
ZNF813
ZMAT3
TMEM158
TPM4
CFI
GPR4
ICAM1
SIX4
SALL4
SERPINE1
ETV5
CEBPB
HS3ST3A1
FGR
NCOR2
TPBG
PODXL
BGN
ADAMTS6
CRIP2
VCAN
GATA2
GRP
ZNF668
SOCS5
S100A12
IFNAR2
FOLR3
RCN3
UNC5B
ST6GALNAC5
CHSY1
NCF2
CST1
RUNX1
FTL
BHLHE22
KIAA1217
EGR2
LZTS1
BCAR1
UACA
LRRC15
KDELR3
HSD3B7
EIF2AK4
BAZ1A
TLR4
ITGA11
COL6A3
COL5A1
CTHRC1
GPC1
CEACAM3
TNIP3
ADAM12
FRMD5
PROX1
ASAP1
VEZT
CCND1
FZD10
TIMP1
HYAL2
POSTN
ZNF430
SPTY2D1
GPBAR1
DCBLD1
GOLGA2
GZMB
PLA2G7
GPX8
PCDH17
DLC1
CLEC11A
NOD2
PLVAP
TMEM204
GJA1
FOXC1
FKBP14
USP13
TMEM184B
FKBP1A
CSF2
